# Supplementary material for: Toward high performance broad spectral hybrid organic–inorganic photodetectors based on multiple component organic bulk heterojunctions
Source: Royal Society of Chemistry journal article supplement (doi:10.1039/c5tc03144c), 2015-12-18
Supplement: c5tc03144c1.pdf [file c5tc03144c1.pdf]

**Electronic Supplementary Information (ESI) for the article entitled:  
Toward high performance broad spectral hybrid organic-inorganic  
photodiodes based on multiple component organic bulk  
heterojunctions**

Feiyu Zhao<sup>1, a</sup>, Xiao Luo<sup>1, a</sup>, Jinfeng Liu<sup>1</sup>, Lili Du<sup>1</sup>, WenLi Lv<sup>1</sup>, Lei Sun<sup>1</sup>, Yao Li<sup>1</sup>, Ying Wang<sup>1</sup>, and Yingquan Peng<sup>1, 2, \*</sup>

<sup>1</sup>*Institute of Microelectronics, School of Physical Science and Technology, Lanzhou University, South Tianshui Road 222#, Lanzhou 730000, China*

<sup>2</sup>*College of Optical and Electronic Technology, China Jiliang University, Hangzhou 310018, China*

\*To whom correspondence and requests for materials should be addressed:

yqpeng@lzu.edu.cn (Y. Peng).

<sup>a</sup>These authors equally contributed to this work.

✧ **Estimation of optimized weight ratio for multiple component organic bulk heterojunctions, leading to uniform and broadband photoabsorption**

We have optimized the weight ratio of different bulk heterojunction films. Compared to three-component devices the two-component devices with PTCDA:CuPc (weight ratio 1:1) don't have a uniform absorption spectra or photo responsivity which has been proved in the Fig. 2, Fig. 5a and Table 2. Especially, the two-component PTCDA:CuPc film has a low absorption in NIR region. Thus, we introduce NIR photosensitive material, PbPc, into PTCDA:CuPc film to form three-component film.

In order to achieve uniform and broadband photoabsorption, we try to determine the optimized weight ratio for three-component PTCDA:CuPc:PbPc film. As a result, we have implemented a series of weight-ratio studies for the three-component bulk heterojunction films. Different weight ratios of 1:1:1, 1:1:1.5 and 2:1:1.5 films and corresponding devices have been prepared here. As for broad spectral photodetection, the three-component devices with weight ratio of 2:1:1.5 achieve a relatively uniform absorption spectra and higher photocurrent for visible-NIR region (Fig. S1 and Fig. S2 below). Consequently, we think that the three-component device with 2:1:1.5 weight-ratio film exhibits better performance than other devices.

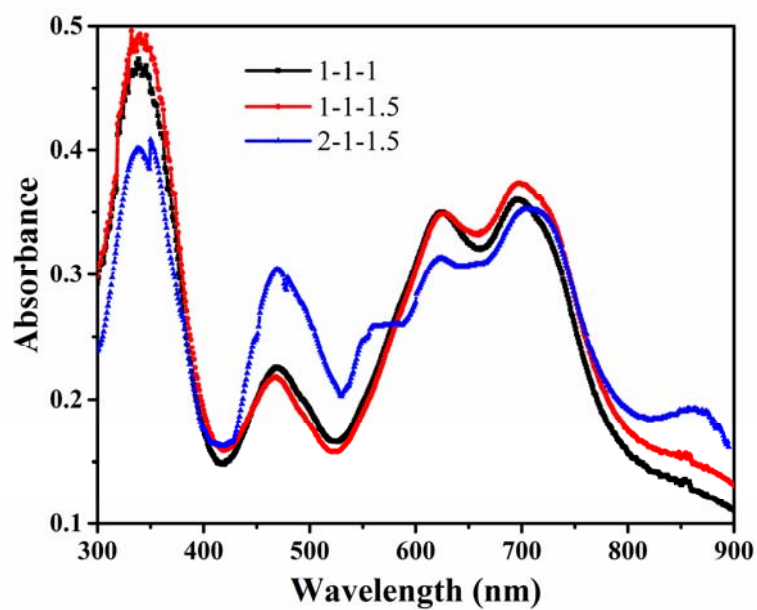

**Fig. S1.** Optical absorption spectra of PTCDA:CuPc:PbPc films on quartz glasses with different weight ratios of 1:1:1, 1:1:1.5 and 2:1:1.5.

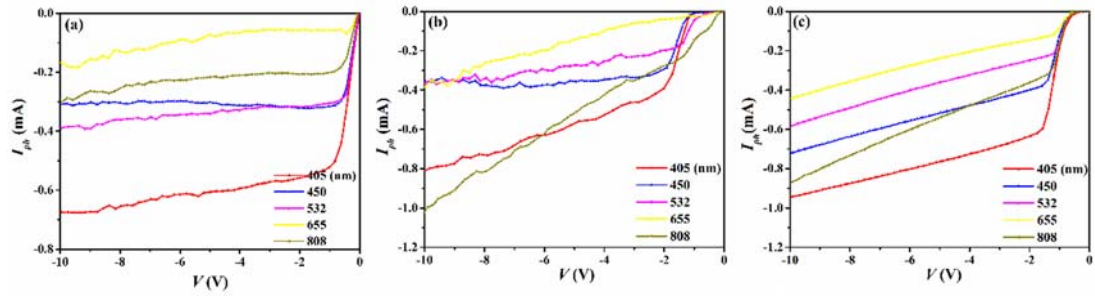

**Fig. S2.** Dependence of photocurrent  $I_{ph}$  on the reverse bias voltage for different-wavelength illumination at incident optical power of  $\sim 8.5 \mu\text{W}$  with different weight ratios of (a) 1:1:1, (b) 1:1:1.5 and (c) 2:1:1.5.
